# Supplementary material for: Dark matter in archaeal genomes: a rich source of novel mobile elements, defense systems and secretory complexes
Source: Extremophiles. 2014 Aug 12;18(5):877–93. doi: 10.1007/s00792-014-0672-7 (PMC4158269; doi:10.1007/s00792-014-0672-7)
Supplement: Supplementary file 1 — Supplementary material 1 (PDF 6091 kb) [file 792_2014_672_MOESM1_ESM.pdf]

| GI      | RefSeq protein annotation    | Signal present | Number of segments |   | Being in evidence | Integrated element | Gene start | Start/End                  |                            | Origin     | Gene partition | BLAST/blast | ACOG | ACOG count | ACOG negative | Functional name in ACOG | ACOG annotation | Best BLAST hit (e-value) | Best BLAST hit (e-value) | Best BLAST hit (e-value) |
|---------|------------------------------|----------------|--------------------|---|-------------------|--------------------|------------|----------------------------|----------------------------|------------|----------------|-------------|------|------------|---------------|-------------------------|-----------------|--------------------------|--------------------------|--------------------------|
|         |                              |                |                    |   |                   |                    |            |                            |                            |            |                |             |      |            |               |                         |                 |                          |                          |                          |
| 1276667 | hypothetical protein A05_084 | No             | 0                  | 0 | 0                 | 0                  | 88652      | 88636                      | Acidobacterium, AT_1460675 | NC_015318  | chromosome     | NC_015318   |      |            |               |                         |                 |                          |                          |                          |
| 1276668 | hypothetical protein A05_084 | No             | 0                  | 0 | 0                 | 88668              | 88654      | Acidobacterium, AT_1460675 | NC_015318                  | chromosome | NC_015318      |             |      |            |               |                         |                 |                          |                          |                          |
| 1276669 | hypothetical protein A05_084 | No             | 0                  | 0 | 0                 | 88680              | 88667      | Acidobacterium, AT_1460675 | NC_015318                  | chromosome | NC_015318      |             |      |            |               |                         |                 |                          |                          |                          |
| 1276670 | hypothetical protein A05_084 | No             | 0                  | 0 | 0                 | 88692              | 88679      | Acidobacterium, AT_1460675 | NC_015318                  | chromosome | NC_015318      |             |      |            |               |                         |                 |                          |                          |                          |
| 1276671 | hypothetical protein A05_084 | No             | 0                  | 0 | 0                 | 88692              | 88679      | Acidobacterium, AT_1460675 | NC_015318                  | chromosome | NC_015318      |             |      |            |               |                         |                 |                          |                          |                          |
| 1276672 | hypothetical protein A05_084 | No             | 0                  | 0 | 0                 | 88692              | 88679      | Acidobacterium, AT_1460675 | NC_015318                  | chromosome | NC_015318      |             |      |            |               |                         |                 |                          |                          |                          |
| 1276673 | hypothetical protein A05_084 | No             | 0                  | 0 | 0                 | 88692              | 88679      | Acidobacterium, AT_1460675 | NC_015318                  | chromosome | NC_015318      |             |      |            |               |                         |                 |                          |                          |                          |
| 1276674 | hypothetical protein A05_084 | No             | 0                  | 0 | 0                 | 88692              | 88679      | Acidobacterium, AT_1460675 | NC_015318                  | chromosome | NC_015318      |             |      |            |               |                         |                 |                          |                          |                          |
| 1276675 | hypothetical protein A05_084 | No             | 0                  | 0 | 0                 | 88692              | 88679      | Acidobacterium, AT_1460675 | NC_015318                  | chromosome | NC_015318      |             |      |            |               |                         |                 |                          |                          |                          |
| 1276676 | hypothetical protein A05_084 | No             | 0                  | 0 | 0                 | 88692              | 88679      | Acidobacterium, AT_1460675 | NC_015318                  | chromosome | NC_015318      |             |      |            |               |                         |                 |                          |                          |                          |
| 1276677 | hypothetical protein A05_084 | No             | 0                  | 0 | 0                 | 88692              | 88679      | Acidobacterium, AT_1460675 | NC_015318                  | chromosome | NC_015318      |             |      |            |               |                         |                 |                          |                          |                          |
| 1276678 | hypothetical protein A05_084 | No             | 0                  | 0 | 0                 | 88692              | 88679      | Acidobacterium, AT_1460675 | NC_015318                  | chromosome | NC_015318      |             |      |            |               |                         |                 |                          |                          |                          |
| 1276679 | hypothetical protein A05_084 | No             | 0                  | 0 | 0                 | 88692              | 88679      | Acidobacterium, AT_1460675 | NC_015318                  | chromosome | NC_015318      |             |      |            |               |                         |                 |                          |                          |                          |
| 1276680 | hypothetical protein A05_084 | No             | 0                  | 0 | 0                 | 88692              | 88679      | Acidobacterium, AT_1460675 | NC_015318                  | chromosome | NC_015318      |             |      |            |               |                         |                 |                          |                          |                          |
| 1276681 | hypothetical protein A05_084 | No             | 0                  | 0 | 0                 | 88692              | 88679      | Acidobacterium, AT_1460675 | NC_015318                  | chromosome | NC_015318      |             |      |            |               |                         |                 |                          |                          |                          |
| 1276682 | hypothetical protein A05_084 | No             | 0                  | 0 | 0                 | 88692              | 88679      | Acidobacterium, AT_1460675 | NC_015318                  | chromosome | NC_015318      |             |      |            |               |                         |                 |                          |                          |                          |
| 1276683 | hypothetical protein A05_084 | No             | 0                  | 0 | 0                 | 88692              | 88679      | Acidobacterium, AT_1460675 | NC_015318                  | chromosome | NC_015318      |             |      |            |               |                         |                 |                          |                          |                          |
| 1276684 | hypothetical protein A05_084 | No             | 0                  | 0 | 0                 | 88692              | 88679      | Acidobacterium, AT_1460675 | NC_015318                  | chromosome | NC_015318      |             |      |            |               |                         |                 |                          |                          |                          |
| 1276685 | hypothetical protein A05_084 | No             | 0                  | 0 | 0                 | 88692              | 88679      | Acidobacterium, AT_1460675 | NC_015318                  | chromosome | NC_015318      |             |      |            |               |                         |                 |                          |                          |                          |
| 1276686 | hypothetical protein A05_084 | No             | 0                  | 0 | 0                 | 88692              | 88679      | Acidobacterium, AT_1460675 | NC_015318                  | chromosome | NC_015318      |             |      |            |               |                         |                 |                          |                          |                          |
| 1276687 | hypothetical protein A05_084 | No             | 0                  | 0 | 0                 | 88692              | 88679      | Acidobacterium, AT_1460675 | NC_015318                  | chromosome | NC_015318      |             |      |            |               |                         |                 |                          |                          |                          |
| 1276688 | hypothetical protein A05_084 | No             | 0                  | 0 | 0                 | 88692              | 88679      | Acidobacterium, AT_1460675 | NC_015318                  | chromosome | NC_015318      |             |      |            |               |                         |                 |                          |                          |                          |
| 1276689 | hypothetical protein A05_084 | No             | 0</                |   |                   |                    |            |                            |                            |            |                |             |      |            |               |                         |                 |                          |                          |                          |

[illegible]

[illegible]





[illegible]





[illegible]



[illegible]

[illegible]

[illegible]

[illegible]

[illegible]

[illegible]

[illegible]



|         |                                 |     |   |         |         |         |   |                  |                |           |            |            |   |   |     |                                |                                                |  |
|---------|---------------------------------|-----|---|---------|---------|---------|---|------------------|----------------|-----------|------------|------------|---|---|-----|--------------------------------|------------------------------------------------|--|
| 1397268 | hypothetical protein NS164_1051 | No  | 0 | 1       | 1141428 | 1141838 | + | Membrane-located | SWALL_L4463759 | NC_055574 | chromosome | arCOG16248 | 3 | S |     |                                | Uncharacterized conserved protein              |  |
| 1397269 | hypothetical protein NS164_1054 | No  | 2 | 1141903 | 1142111 | +       | + | Membrane-located | SWALL_L4463759 | NC_055574 | chromosome | arCOG16251 | 2 | S |     |                                | Uncharacterized conserved protein              |  |
| 1397270 | chaperone                       | No  | 0 | 1142239 | 1143261 | +       | + | Membrane-located | SWALL_L4463759 | NC_055574 | chromosome | arCOG15118 | 2 | G | FnX | Cellulose M or related protein | SE-12 COG1363 Cellulose M and related proteins |  |
| 1397271 | chaperone                       | Yes | 0 | 1143993 | 1144522 | +       | + | Membrane-located | SWALL_L4463759 | NC_055574 | chromosome | arCOG16865 | 9 | S |     |                                | Uncharacterized conserved protein              |  |
| 1397272 | hypothetical protein NS164_1057 | Yes | 0 | 1144444 | 1144960 | +       | + | Membrane-located | SWALL_L4463759 | NC_055574 | chromosome | arCOG16865 | 9 | S |     |                                | Uncharacterized conserved protein              |  |
| 1397273 | hypothetical protein NS164_1058 | No  | 0 | 1144811 | 1145249 | +       | + | Membrane-located | SWALL_L4463759 | NC_055574 | chromosome | arCOG16865 | 9 | S |     |                                | Uncharacterized conserved protein              |  |
| 1397274 | hypothetical protein NS164_1059 | No  | 0 | 1144818 | 1145249 | +       | + | Membrane-located | SWALL_L4463759 | NC_055574 | chromosome | arCOG16865 | 9 | S |     |                                | Uncharacterized conserved protein              |  |
| 1397275 | hypothetical protein NS164_1060 | No  | 0 | 1144818 | 1145249 | +       | + | Membrane-located | SWALL_L4463759 | NC_055574 | chromosome | arCOG16865 | 9 | S |     |                                | Uncharacterized conserved protein              |  |
| 1397276 | hypothetical protein NS164_1061 | No  | 0 | 1144818 | 1145249 | +       | + | Membrane-located | SWALL_L4463759 | NC_055574 | chromosome | arCOG16865 | 9 | S |     |                                | Uncharacterized conserved protein              |  |
| 1397277 | hypothetical protein NS164_1062 | No  | 0 | 1144818 | 1145249 | +       | + | Membrane-located | SWALL_L4463759 | NC_055574 | chromosome | arCOG16865 | 9 | S |     |                                | Uncharacterized conserved protein              |  |
| 1397278 | hypothetical protein NS164_1063 | No  | 0 | 1144818 | 1145249 | +       | + | Membrane-located | SWALL_L4463759 | NC_055574 | chromosome | arCOG16865 | 9 | S |     |                                | Uncharacterized conserved protein              |  |
| 1397279 | hypothetical protein NS164_1064 | No  | 0 | 1144818 | 1145249 | +       | + | Membrane-located | SWALL_L4463759 | NC_055574 | chromosome | arCOG16865 | 9 | S |     |                                | Uncharacterized conserved protein              |  |
| 1397280 | hypothetical protein NS164_1065 | No  | 0 | 1144818 | 1145249 | +       | + | Membrane-located | SWALL_L4463759 | NC_055574 | chromosome | arCOG16865 | 9 | S |     |                                | Uncharacterized conserved protein              |  |
| 1397281 | hypothetical protein NS164_1066 | No  | 0 | 1144818 | 1145249 | +       | + | Membrane-located | SWALL_L4463759 | NC_055574 | chromosome | arCOG16865 | 9 | S |     |                                | Uncharacterized conserved protein              |  |
| 1397282 | hypothetical protein NS164_1067 | No  | 0 | 1144818 | 1145249 | +       | + | Membrane-located | SWALL_L4463759 | NC_055574 | chromosome | arCOG16865 | 9 | S |     |                                | Uncharacterized conserved protein              |  |
| 1397283 | hypothetical protein NS164_1068 | No  | 0 | 1144818 | 1145249 | +       | + | Membrane-located | SWALL_L4463759 | NC_055574 | chromosome | arCOG16865 | 9 | S |     |                                | Uncharacterized conserved protein              |  |
| 1397284 | hypothetical protein NS164_1069 | No  | 0 | 1144818 | 1145249 | +       | + | Membrane-located | SWALL_L4463759 | NC_055574 | chromosome | arCOG16865 | 9 | S |     |                                | Uncharacterized conserved protein              |  |
| 1397285 | hypothetical protein NS164_1070 | No  | 0 | 1144818 | 1145249 | +       | + | Membrane-located | SWALL_L4463759 | NC_055574 | chromosome | arCOG16865 | 9 | S |     |                                | Uncharacterized conserved protein              |  |
| 1397286 | hypothetical protein NS164_1071 | No  | 0 | 1144818 | 1145249 | +       | + | Membrane-located | SWALL_L4463759 | NC_055574 | chromosome | arCOG16865 | 9 | S |     |                                | Uncharacterized conserved protein              |  |
| 1397287 | hypothetical protein NS164_1072 | No  | 0 | 1144818 | 1145249 | +       | + | Membrane-located | SWALL_L4463759 | NC_055574 | chromosome | arCOG16865 | 9 | S |     |                                | Uncharacterized conserved protein              |  |
| 1397288 | hypothetical protein NS164_1073 | No  | 0 | 1144818 | 1145249 | +       | + | Membrane-located | SWALL_L4463759 | NC_055574 | chromosome | arCOG16865 | 9 | S |     |                                | Uncharacterized conserved protein              |  |
| 1397289 | hypothetical protein NS164_1074 | No  | 0 | 1144818 | 1145249 | +       | + | Membrane-located | SWALL_L4463759 | NC_055574 | chromosome | arCOG16865 | 9 | S |     |                                | Uncharacterized conserved protein              |  |
| 1397290 | hypothetical protein NS164_1075 | No  | 0 | 1144818 | 1145249 | +       | + | Membrane-located | SWALL_L4463759 | NC_055574 | chromosome | arCOG16865 | 9 | S |     |                                | Uncharacterized conserved protein              |  |
| 1397291 | hypothetical protein NS164_1076 | No  | 0 | 1144818 | 1145249 | +       | + | Membrane-located | SWALL_L4463759 | NC_055574 | chromosome | arCOG16865 | 9 | S |     |                                | Uncharacterized conserved protein              |  |
| 1397292 |                                 |     |   |         |         |         |   |                  |                |           |            |            |   |   |     |                                |                                                |  |

[illegible]

[illegible]

[illegible]

|         |                                                         |     |   |            |        |                                          |                                          |            |            |             |    |      |                                   |                                               |         |                                  |                                          |
|---------|---------------------------------------------------------|-----|---|------------|--------|------------------------------------------|------------------------------------------|------------|------------|-------------|----|------|-----------------------------------|-----------------------------------------------|---------|----------------------------------|------------------------------------------|
| 1400099 | hypothetical protein Msa_3526                           | Yes | 2 | 56030      | 54490  | Mbhorococcus, mborococcus_Nank_1_4508023 | NC_096263                                | chromosome | acCG03897  | 10          | S  | SpoM | Uncharacterized conserved protein | 1E-18                                         | CCG130  | Uncharacterized membrane protein |                                          |
| 1400099 | hypothetical protein Msa_3527                           | No  | 0 | 56031      | 54491  | Mbhorococcus, mborococcus_Nank_1_4508023 | NC_096263                                | chromosome | acCG03897  | 10          | S  |      | Uncharacterized conserved protein |                                               |         |                                  |                                          |
| 1400099 | hypothetical protein Msa_3528                           | No  | 0 | 56032      | 54492  | Mbhorococcus, mborococcus_Nank_1_4508023 | NC_096263                                | chromosome | acCG03897  | 10          | S  |      | Uncharacterized conserved protein |                                               |         |                                  |                                          |
| 1400099 | hypothetical protein Msa_3529                           | Yes | 2 | 56179      | 54743  | Mbhorococcus, mborococcus_Nank_1_4508023 | NC_096263                                | chromosome | acCG03897  | 10          | S  |      | Uncharacterized conserved protein |                                               |         |                                  |                                          |
| 1400099 | hypothetical protein Msa_3530                           | No  | 0 | 56179      | 54743  | Mbhorococcus, mborococcus_Nank_1_4508023 | NC_096263                                | chromosome | acCG03897  | 10          | S  |      | Uncharacterized conserved protein |                                               |         |                                  |                                          |
| 1400196 | ATPase, 4F-4S, translocates iron-sulfur binding domains | No  | 0 | 96207      | 96209  | Mbhorococcus, mborococcus_Nank_1_4508023 | NC_096263                                | chromosome | acCG03897  | 10          | C  | NafF | Ferredoxin                        | 0.0000001                                     | CCG1146 | Ferredoxin                       |                                          |
| 1400196 | hypothetical protein Msa_3912                           | No  | 1 | 96217      | 96229  | Mbhorococcus, mborococcus_Nank_1_4508023 | NC_096263                                | chromosome | acCG03897  | 10          | C  |      |                                   |                                               |         |                                  |                                          |
| 1400196 | hypothetical protein Msa_3913                           | No  | 0 | 96228      | 96232  | Mbhorococcus, mborococcus_Nank_1_4508023 | NC_096263                                | chromosome | acCG03897  | 10          | C  |      |                                   |                                               |         |                                  |                                          |
| 1400196 | hypothetical protein Msa_3914                           | No  | 0 | 96248      | 96261  | Mbhorococcus, mborococcus_Nank_1_4508023 | NC_096263                                | chromosome | acCG03897  | 10          | C  |      |                                   |                                               |         |                                  |                                          |
| 1400196 | hypothetical protein Msa_3915                           | No  | 0 | 96214      | 96266  | Mbhorococcus, mborococcus_Nank_1_4508023 | NC_096263                                | chromosome | acCG03897  | 10          | C  |      |                                   |                                               |         |                                  |                                          |
| 1400196 | hypothetical protein Msa_3916                           | Yes | 1 | 96218      | 96226  | Mbhorococcus, mborococcus_Nank_1_4508023 | NC_096263                                | chromosome | acCG03897  | 10          | C  |      |                                   |                                               |         |                                  |                                          |
| 1400196 | ATPase                                                  | No  | 0 | 96249      | 96256  | Mbhorococcus, mborococcus_Nank_1_4508023 | NC_096263                                | chromosome | acCG03897  | 10          | C  |      |                                   |                                               |         |                                  |                                          |
| 1400196 | hypothetical protein Msa_1227                           | No  | 0 | Integrated | 129752 | 129778                                   | Mbhorococcus, mborococcus_Nank_1_4508023 | NC_096263  | chromosome | acCG03897   | 21 | V    | NAR                               | Transcriptional regulator, CysG-like family 0 | 2E-10   | CCG084                           | Predicted transcriptional regulator, con |
| 1400196 | hypothetical protein Msa_1228                           | No  | 0 | Integrated | 129753 | 129779                                   | Mbhorococcus, mborococcus_Nank_1_4508023 | NC_096263  | chromosome | acCG03897   | 21 | V    |                                   | Predicted transcriptional regulator           |         |                                  |                                          |
| 1400196 | hypothetical protein Msa_1229                           | No  | 0 | Integrated | 129754 | 129780                                   | Mbhorococcus, mborococcus_Nank_1_4508023 | NC_096263  | chromosome | acCG03897   | 21 | V    |                                   | Uncharacterized conserved protein             |         |                                  |                                          |
| 1400196 | hypothetical protein Msa_1230                           | No  | 0 | Integrated | 129755 | 129781                                   | Mbhorococcus, mborococcus_Nank_1_4508023 | NC_096263  | chromosome | acCG03897   | 21 | V    |                                   | Uncharacterized conserved protein             |         |                                  |                                          |
| 1400196 | hypothetical protein Msa_1231                           | No  | 2 | Integrated | 129756 | 129782                                   | Mbhorococcus, mborococcus_Nank_1_4508023 | NC_096263  | chromosome | acCG03897   | 21 | V    |                                   | Uncharacterized conserved protein             |         |                                  |                                          |
| 1400196 | hypothetical protein Msa_1232                           | No  | 0 | Integrated | 129757 | 129783                                   | Mbhorococcus, mborococcus_Nank_1_4508023 | NC_096263  | chromosome | acCG03897   | 21 | V    |                                   | Uncharacterized conserved protein             |         |                                  |                                          |
| 1400196 | hypothetical protein Msa_1233                           | No  | 0 | Integrated | 129758 | 129784                                   | Mbhorococcus, mborococcus_Nank_1_4508023 | NC_096263  | chromosome | acCG03897   | 21 | V    |                                   | Uncharacterized conserved protein             |         |                                  |                                          |
| 1400196 | hypothetical protein Msa_1234                           | No  | 0 | Integrated | 129759 | 129785                                   | Mbhorococcus, mborococcus_Nank_1_4508023 | NC_096263  | chromosome | acCG03897   | 21 | V    |                                   | Uncharacterized conserved protein             |         |                                  |                                          |
| 1400196 | hypothetical protein Msa_1235                           | No  | 0 | Integrated | 129760 | 129786                                   | Mbhorococcus, mborococcus_Nank_1_4508023 | NC_096263  | chromosome | acCG03897   | 21 | V    |                                   | Uncharacterized conserved protein             |         |                                  |                                          |
| 1400196 | hypothetical protein Msa_1236                           | No  | 0 | Integrated | 129761 | 129787                                   | Mbhorococcus, mborococcus_Nank_1_4508023 | NC_096263  | chromosome | acCG03897   | 21 | V    |                                   | Uncharacterized conserved protein             |         |                                  |                                          |
| 1400196 | hypothetical protein Msa_1237                           | No  | 0 | Integrated | 129762 | 129788                                   | Mbhorococcus, mborococcus_Nank_1_4508023 | NC_096263  | chromosome | acCG03897   | 21 | V    |                                   | Uncharacterized conserved protein             |         |                                  |                                          |
| 1400196 | hypothetical protein Msa_1238                           | No  | 0 | Integrated | 129763 | 129789                                   | Mbhorococcus, mborococcus_Nank_1_4508023 | NC_096263  | chromosome | acCG03897   | 21 | V    |                                   | Uncharacterized conserved protein             |         |                                  |                                          |
| 1400196 | hypothetical protein Msa_1239                           | No  | 0 | Integrated | 129764 | 129790                                   | Mbhorococcus, mborococcus_Nank_1_4508023 | NC_096263  | chromosome | acCG03897</ |    |      |                                   |                                               |         |                                  |                                          |

[illegible]

[illegible]

[illegible]

[illegible]

[illegible]

[illegible]

[illegible]

[illegible]

[illegible]



[illegible]

[illegible]

[illegible]



[illegible]

|   |     |       |       |                                  |          |            |          |       |   |                                   |                  |                                    |
|---|-----|-------|-------|----------------------------------|----------|------------|----------|-------|---|-----------------------------------|------------------|------------------------------------|
| 1 | 0   | 42055 | 42057 | Pseudomonas_aeruginosa_PAE105773 | NC_00344 | chromosome | ac000491 | 2 (1) | L | Transposase                       |                  |                                    |
| 1 | YES | 42055 | 42058 | Pseudomonas_aeruginosa_PAE105773 | NC_00344 | chromosome | ac000492 | 6     | S | Uncharacterized conserved protein |                  |                                    |
| 1 | 0   | 43300 | 43301 | Pseudomonas_aeruginosa_PAE105773 | NC_00344 | chromosome | ac000493 | 8     | S | Uncharacterized conserved protein |                  |                                    |
| 1 | YES | 43300 | 43302 | Pseudomonas_aeruginosa_PAE105773 | NC_00344 | chromosome | ac000494 | 8     | S | Uncharacterized conserved protein |                  |                                    |
| 1 | 0   | 43301 | 43302 | Pseudomonas_aeruginosa_PAE105773 | NC_00344 | chromosome | ac000495 | 5 (1) | L | SdsB                              | DNA repair phage | 25.68 CG0133                       |
| 1 | 0   | 43302 | 43303 | Pseudomonas_aeruginosa_PAE105773 | NC_00344 | chromosome | ac000496 | 1     | S | Uncharacterized conserved protein |                  |                                    |
| 1 | 0   | 43303 | 43304 | Pseudomonas_aeruginosa_PAE105773 | NC_00344 | chromosome | ac000497 | 2 (1) | S | Uncharacterized conserved protein | 14-41 CG02729    | Predicted phosphatases, related to |
| 1 | 0   | 43304 | 43305 | Pseudomonas_aeruginosa_PAE105773 | NC_00344 | chromosome | ac000498 | 2 (1) | S | Uncharacterized conserved protein |                  |                                    |
| 1 | 0   | 43305 | 43306 | Pseudomonas_aeruginosa_PAE105773 | NC_00344 | chromosome | ac000499 | 2 (1) | S | Uncharacterized conserved protein |                  |                                    |
| 1 | 0   | 43306 | 43307 | Pseudomonas_aeruginosa_PAE105773 | NC_00344 | chromosome | ac000500 | 2 (1) | S | Uncharacterized conserved protein |                  |                                    |
| 1 | 0   | 43307 | 43308 | Pseudomonas_aeruginosa_PAE105773 | NC_00344 | chromosome | ac000501 | 2 (1) | S | Uncharacterized conserved protein |                  |                                    |
| 1 | 0   | 43308 | 43309 | Pseudomonas_aeruginosa_PAE105773 | NC_00344 | chromosome | ac000502 | 2 (1) | S | Uncharacterized conserved protein |                  |                                    |
| 1 | 0   | 43309 | 43310 | Pseudomonas_aeruginosa_PAE105773 | NC_00344 | chromosome | ac000503 | 2 (1) | S | Uncharacterized conserved protein |                  |                                    |
| 1 | 0   | 43310 | 43311 | Pseudomonas_aeruginosa_PAE105773 | NC_00344 | chromosome | ac000504 | 2 (1) | S | Uncharacterized conserved protein |                  |                                    |
| 1 | 0   | 43311 | 43312 | Pseudomonas_aeruginosa_PAE105773 | NC_00344 | chromosome | ac000505 | 2 (1) | S | Uncharacterized conserved protein |                  |                                    |
| 1 | 0   | 43312 | 43313 | Pseudomonas_aeruginosa_PAE105773 | NC_00344 | chromosome | ac000506 | 2 (1) | S | Uncharacterized conserved protein |                  |                                    |
| 1 | 0   | 43313 | 43314 | Pseudomonas_aeruginosa_PAE105773 | NC_00344 | chromosome | ac000507 | 2 (1) | S | Uncharacterized conserved protein |                  |                                    |
| 1 | 0   | 43314 | 43315 | Pseudomonas_aeruginosa_PAE105773 | NC_00344 | chromosome | ac000508 | 2 (1) | S | Uncharacterized conserved protein |                  |                                    |
| 1 | 0   | 43315 | 43316 | Pseudomonas_aeruginosa_PAE105773 | NC_00344 | chromosome | ac000509 | 2 (1) | S | Uncharacterized conserved protein |                  |                                    |
| 1 | 0   | 43316 | 43317 | Pseudomonas_aeruginosa_PAE105773 | NC_00344 | chromosome | ac000510 | 2 (1) | S | Uncharacterized conserved protein |                  |                                    |
| 1 | 0   | 43317 | 43318 | Pseudomonas_aeruginosa_PAE105773 | NC_00344 | chromosome | ac000511 | 2 (1) | S | Uncharacterized conserved protein |                  |                                    |
| 1 | 0   | 43318 | 43319 | Pseudomonas_aeruginosa_PAE105773 | NC_00344 | chromosome | ac000512 | 2 (1) | S | Uncharacterized conserved protein |                  |                                    |
| 1 | 0   | 43319 | 43320 | Pseudomonas_aeruginosa_PAE105773 | NC_00344 | chromosome | ac000513 | 2 (1) | S | Uncharacterized conserved protein |                  |                                    |
| 1 | 0   | 43320 | 43321 | Pseudomonas_aeruginosa_PAE105773 | NC_00344 | chromosome | ac000514 | 2 (1) | S | Uncharacterized conserved protein |                  |                                    |
| 1 | 0   | 43321 | 43322 | Pseudomonas_aeruginosa_PAE105773 | NC_00344 | chromosome | ac000515 | 2 (1) | S | Uncharacterized conserved protein |                  |                                    |
| 1 | 0   | 43322 | 43323 | Pseudomonas_aeruginosa_PAE105773 | NC_00344 | chromosome | ac000516 | 2 (1) | S | Uncharacterized conserved protein |                  |                                    |
| 1 | 0   | 43323 | 43324 | Pseudomonas_aeruginosa_PAE105773 | NC_00344 | chromosome | ac000517 | 2 (1) | S | Uncharacterized conserved protein |                  |                                    |
| 1 | 0   | 43324 | 43325 | Pseudomonas_aeruginosa_PAE105773 | NC_00344 | chromosome | ac000518 | 2 (1) | S | Uncharacterized conserved protein |                  |                                    |
| 1 | 0   | 43325 | 43326 | Pseudomonas_aeruginosa_PAE105773 | NC_00344 | chromosome | ac000519 | 2 (1) | S | Uncharacterized conserved protein |                  |                                    |
| 1 | 0   | 43326 | 43327 | Pseudomonas_aeruginosa_PAE105773 | NC_00344 | chromosome | ac000520 | 2 (1) | S | Uncharacterized conserved protein |                  |                                    |
| 1 | 0   | 43327 | 43328 | Pseudomonas_aeruginosa_PAE105773 | NC_00344 | chromosome | ac000521 | 2 (1) | S | Uncharacterized conserved protein |                  |                                    |
| 1 | 0   | 43328 | 43329 | Pseudomonas_aeruginosa_PAE105773 | NC_00344 | chromosome | ac000522 | 2 (1) | S | Uncharacterized conserved protein |                  |                                    |
| 1 | 0   | 43329 | 43330 | Pseudomonas_aeruginosa_PAE105773 | NC_00344 | chromosome | ac000523 | 2 (1) | S | Uncharacterized conserved protein |                  |                                    |
| 1 | 0   | 43330 | 43331 | Pseudomonas_aeruginosa_PAE105773 | NC_00344 | chromosome | ac000524 | 2 (1) | S | Uncharacterized conserved protein |                  |                                    |
| 1 | 0   | 43331 |       |                                  |          |            |          |       |   |                                   |                  |                                    |

[illegible]





[illegible]







[illegible]
